# Supplementary material
Source: PubMed Central journal article supplement (PMC6141010)

A

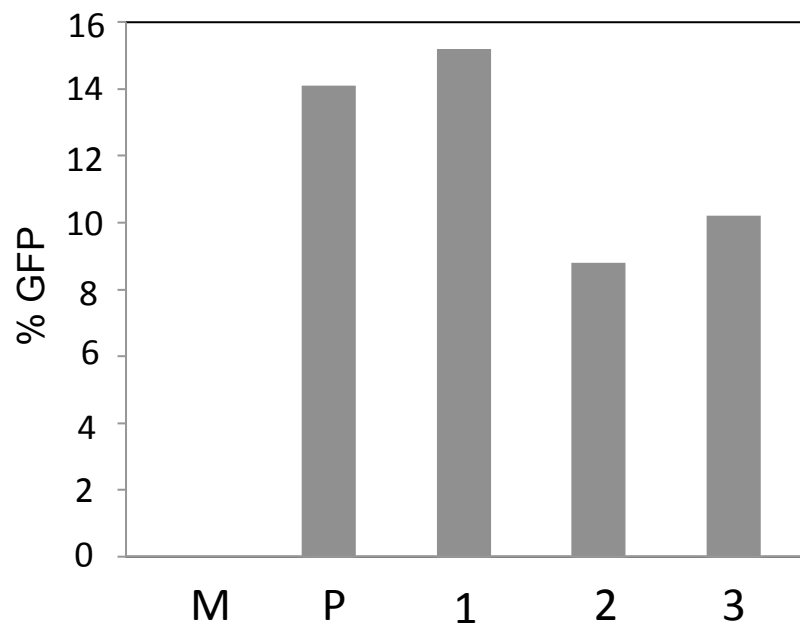

B

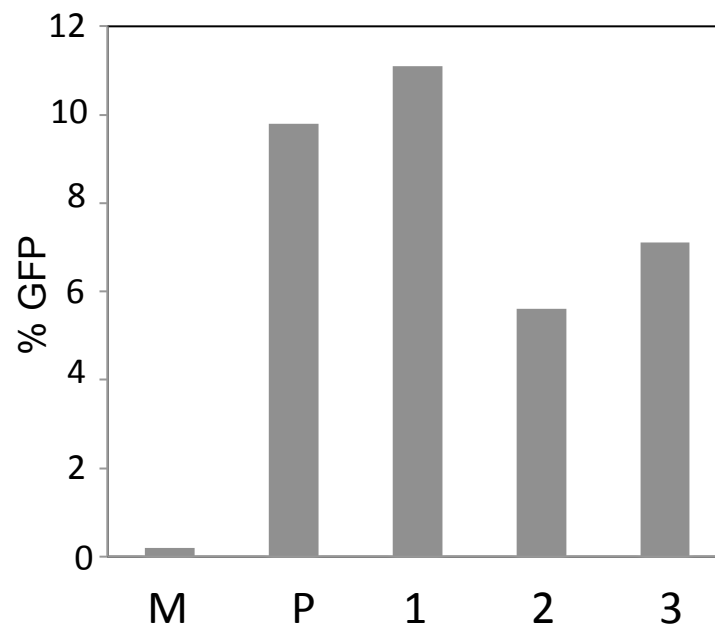

**Supplementary Figure 1.**

Supplement: NIHMS814759-supplement-Supplemental_Data_File___doc___tif__pdf__etc__.pdf [file NIHMS814759-supplement-Supplemental_Data_File___doc___tif__pdf__etc__.pdf]
